# Supplementary material for: Universal newborn hearing screening in South Africa: a single-centre study
Source: PubMed Central journal article supplement — BMJ Paediatr Open. 2021 Mar 18;5(1):e000976. doi: 10.1136/bmjpo-2020-000976 (PMC7978244; doi:10.1136/bmjpo-2020-000976), 2021-03-18
Supplement: bmjpo-2020-000976.draft_revisions.pdf [file bmjpo-2020-000976.draft_revisions.pdf]

# BMJ Paediatrics Open

BMJ Paediatrics Open is committed to open peer review. As part of this commitment we make the peer review history of every article we publish publicly available.

When an article is published we post the peer reviewers' comments and the authors' responses online. We also post the versions of the paper that were used during peer review. These are the versions that the peer review comments apply to.

The versions of the paper that follow are the versions that were submitted during the peer review process. They are not the versions of record or the final published versions. They should not be cited or distributed as the published version of this manuscript.

BMJ Paediatrics Open is an open access journal and the full, final, typeset and author-corrected version of record of the manuscript is available on our site with no access controls, subscription charges or pay-per-view fees (<http://bmjpaedsopen.bmj.com>).

If you have any questions on BMJ Paediatrics Open's open peer review process please email [info.bmjpo@bmj.com](mailto:info.bmjpo@bmj.com)

# BMJ Paediatrics Open

## Time to Adapt; Need for Contextually Relevant Universal Newborn Hearing Screening

|                               |                                                                                                                                                                                                                                                                                                                                                                                                                                                                                                                                                                |
|-------------------------------|----------------------------------------------------------------------------------------------------------------------------------------------------------------------------------------------------------------------------------------------------------------------------------------------------------------------------------------------------------------------------------------------------------------------------------------------------------------------------------------------------------------------------------------------------------------|
| Journal:                      | <i>BMJ Paediatrics Open</i>                                                                                                                                                                                                                                                                                                                                                                                                                                                                                                                                    |
| Manuscript ID                 | bmjpo-2020-000976                                                                                                                                                                                                                                                                                                                                                                                                                                                                                                                                              |
| Article Type:                 | Original research letter                                                                                                                                                                                                                                                                                                                                                                                                                                                                                                                                       |
| Date Submitted by the Author: | 07-Dec-2020                                                                                                                                                                                                                                                                                                                                                                                                                                                                                                                                                    |
| Complete List of Authors:     | Gina, Ayanda; University of KwaZulu-Natal<br>Bednarczuk, Nadja F; University of Leicester, Department of Psychology, Neuroscience and Behaviour<br>Jayawardena, Asitha; Harvard Medical School, E.N.T Department<br>Rea, Peter; Leicester Royal Infirmary, E.N.T Department<br>Arshad, Qadeer; University of Leicester College of Medicine Biological Sciences and Psychology<br>Saman, Yougan; University of Leicester, Department of Psychology, Neuroscience and Behaviour; Leicester Royal Infirmary, Department of Psychology, Neuroscience and Behaviour |
| Keywords:                     | Audiology                                                                                                                                                                                                                                                                                                                                                                                                                                                                                                                                                      |
|                               |                                                                                                                                                                                                                                                                                                                                                                                                                                                                                                                                                                |

SCHOLARONE™  
Manuscripts

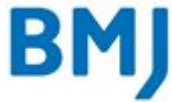

I, the Submitting Author has the right to grant and does grant on behalf of all authors of the Work (as defined in the below author licence), an exclusive licence and/or a non-exclusive licence for contributions from authors who are: i) UK Crown employees; ii) where BMJ has agreed a CC-BY licence shall apply, and/or iii) in accordance with the terms applicable for US Federal Government officers or employees acting as part of their official duties; on a worldwide, perpetual, irrevocable, royalty-free basis to BMJ Publishing Group Ltd ("BMJ") its licensees and where the relevant Journal is co-owned by BMJ to the co-owners of the Journal, to publish the Work in this journal and any other BMJ products and to exploit all rights, as set out in our [licence](#).

The Submitting Author accepts and understands that any supply made under these terms is made by BMJ to the Submitting Author unless you are acting as an employee on behalf of your employer or a postgraduate student of an affiliated institution which is paying any applicable article publishing charge ("APC") for Open Access articles. Where the Submitting Author wishes to make the Work available on an Open Access basis (and intends to pay the relevant APC), the terms of reuse of such Open Access shall be governed by a Creative Commons licence – details of these licences and which [Creative Commons](#) licence will apply to this Work are set out in our licence referred to above.

Other than as permitted in any relevant BMJ Author's Self Archiving Policies, I confirm this Work has not been accepted for publication elsewhere, is not being considered for publication elsewhere and does not duplicate material already published. I confirm all authors consent to publication of this Work and authorise the granting of this licence.

## Time to Adapt; Need for Contextually Relevant Universal Newborn Hearing Screening

Ayanda Gina MSc<sup>1</sup>, Nadja F Bednarczuk MBBS<sup>2,3</sup>, Asitha Jayawardena MD MPH<sup>4</sup>, Peter Rea MBBS<sup>5</sup>, Qadeer Arshad PhD<sup>2</sup>, Yougan Saman MD PhD<sup>1, 2, 5\*</sup>

### Author affiliations;

1. School of Clinical Medicine, University of KwaZulu-Natal, Durban, South Africa
2. inAmind Laboratory, Department of Psychology, Neuroscience and Behaviour, University of Leicester, Leicester, UK. LE1 7RH
3. King's College Hospital London, Denmark Hill, SE5 9RS, London UK
4. E.N.T Department, Massachusetts Eye and Ear Infirmary, Harvard Medical School, USA
5. E.N.T Department, Leicester Royal Infirmary, Leicester, UK, LE1 5WW

### \*Correspondence should be addressed to;

Dr Yougan Saman  
inAmind Laboratory,  
Department of Neuroscience, Psychology and Behaviour,  
University Road, Leicester,  
Leicester,  
UK  
LE1 7RH

[yougan.saman@uhl-tr.nhs.uk](mailto:yougan.saman@uhl-tr.nhs.uk)

Study funding: EuropeAid/134258/M/ACT/ZA Cfp2/2014/15/87

Word count (600)

1  
2  
3 Author Contribution's:  
4  
5

6 AG: Performed experiments, Data analysis, wrote the manuscript

7  
8 NB: Data analysis, edited the manuscript

9  
10 AJ: Experimental design, technical expertise, edited the manuscript

11  
12 PR: technical expertise and edited the manuscript

13  
14 QA: Data analysis, Technical expertise and wrote the manuscript

15  
16 YS: Conceptualised study, experimental design, wrote manuscript and supervised  
17 study  
18  
19  
20  
21  
22  
23  
24  
25  
26  
27  
28  
29  
30  
31  
32  
33  
34  
35  
36  
37  
38  
39  
40  
41  
42  
43  
44  
45  
46  
47  
48  
49  
50  
51  
52  
53  
54  
55  
56  
57  
58  
59  
60

Confidential: For Review Only

1  
2  
3 **ABSTRACT: Hearing screening for new-born babies is an established protocol**  
4 **in many parts of the developed world. Implementing such screening has yielded**  
5 **significant socio-economic advantages at both an individual and societal level,**  
6 **which has yet to infiltrate low and middle income countries (LMIC). Here we**  
7 **illustrate how the new-born hearing screening program needs to be contextually**  
8 **adapted for effective utilisation an implementation in a LMIC. Specifically, this**  
9 **advocates the use of auditory brainstem testing at the first-line approach. We**  
10 **propose that such adaptation serves to maximise clinical efficacy and**  
11 **community participation at a reduced cost.**  
12  
13  
14  
15  
16  
17  
18  
19  
20  
21  
22  
23  
24  
25  
26  
27  
28  
29  
30  
31  
32  
33  
34  
35  
36  
37  
38  
39  
40  
41  
42  
43  
44  
45  
46  
47  
48  
49  
50  
51  
52  
53  
54  
55  
56  
57  
58  
59  
60

1  
2  
3  
4  
5 **INTRODUCTION:** Newborn hearing screening facilitated a silent revolution for the  
6 hearing-impaired yielding significant personal, societal and economic benefits <sup>1</sup>.  
7 However, universal screening still faces barriers, namely the need to pragmatically  
8 integrate screening with existing health infrastructure, cost considerations and access  
9 to healthcare <sup>1</sup>, which are unique depending on the geographical context.

10  
11  
12  
13  
14  
15 Otoacoustic emissions (OAE) and automated auditory brainstem responses (AABR)  
16 have made screening possible, with factors such as cost and training ease being the  
17 main consideration when designing a program <sup>1,2</sup>. OAE's have historically been cheap  
18 and quick but as many as 40% of babies can fail this test requiring referral to  
19 specialists for either a repeat OAE or an ABR <sup>3</sup>. Technological advances since the  
20 advent of screening has seen both the cost-base and time required to perform AABR  
21 considerably reduced <sup>4</sup> making this an attractive first-line option particularly when the  
22 cost of follow-up and poor compliance due to access to healthcare and maternal  
23 anxiety are decisive factors.

24  
25  
26  
27  
28  
29  
30  
31  
32 Accordingly, in settings where early discharge is the norm and access to healthcare is  
33 poor, we propose that it may be more effective to screen neonates with AABR as the  
34 first-line tool.

35  
36  
37  
38  
39 **METHODS:** 2269 healthy neonates were recruited from the maternity ward following  
40 written parental consent in Amajuba. Babies were generally tested with hours of birth  
41 as healthy babies are discharged at 6 hours post- delivery. Testing was always  
42 performed in a silent room within the hospital. Ethical approval was obtained from the  
43 local research ethics committee (\* University of KwaZulu-Natal (UKZN) Biomedical-  
44 Research Ethics Committee (BREC: BFC260/16(Sub-study: BFC412/15)).

45  
46  
47  
48  
49  
50  
51 To assess the auditory brainstem response (ABR) and oto-acoustic emissions (OAE)  
52 for each neonate we used the Path-Sentiero®-Advanced-Screener (Landsberger,  
53 Germany). For auditory brainstem testing we implemented a chirp stimulus  
54 (broadband 1-8kHz) with alternating polarity and a stimulus rate of 85Hz and sound  
55 level of 35 dBHL <sup>5</sup>. For transient OAE, a non-linear broadband click stimulus was  
56  
57  
58  
59  
60

1  
2  
3 presented at a fixed sound-level of 80 db SPL <sup>6</sup>. All testing was performed by a  
4 paediatric audiologist (AG) assisted by two research nurses.  
5  
6  
7  
8

9 *Patient and Public Involvement statement: After identification of the community's needs, the*  
10 *researchers engaged in consultation with the department of health district and hospital*  
11 *managers who were in full support of potentially developing a screening programme.*  
12 *Patients were not involved in the design of the study as it was incorporated into the existing*  
13 *maternal and child health care services.*  
14  
15  
16

17  
18 **RESULTS:** We observed that in neonates screened with ABR, 2120 babies passed  
19 the test, and 149 of the cohort failed the screening. Contrastingly, the OAE test passed  
20 only 655 babies in the cohort and failed 1614 babies. Accordingly, for transient OAE,  
21 we calculated the following values of sensitivity (87.9%), specificity (30%), positive  
22 predictive value (8.11%) and negative predictive value (97.3%).  
23  
24  
25  
26  
27

28 **DISCUSSION:** Our findings highlight that OAE has a high false positive rate as  
29 indicated by its poor specificity. Accordingly, adopting the OAE first protocol in our  
30 sample would have resulted in 1465 unnecessary referrals', imparting significant  
31 financial burden upon both the individual and the healthcare system as well as  
32 considerable anxiety for already disenfranchised parents.  
33  
34  
35  
36  
37

38 These findings have a wider contextual implication, as healthcare resources across  
39 the board are continually being stretched. Thus, a critical spotlight is placed on  
40 expensive initiatives such as screening programs to adapt to simultaneously maximise  
41 clinical efficacy and community participation at an ever-reducing cost.  
42  
43  
44  
45  
46

47 **Acknowledgements:** Firstly, we would like to sincerely thank all the mothers for  
48 agreeing to participate in this study. Also, we would like to thank the two brilliant  
49 research nurses Zama Khubheka and Thembi Nkosi as well as Precious Buthelezi -  
50 the district rehabilitation coordinator for KZN Department of Health. Finally, we would  
51 like to thank the EU for funding this project and the Red Cross Air mercy service for  
52 assistance with travel.  
53  
54  
55  
56  
57  
58  
59  
60



## REFERENCES

1. Morton CC, Nance WE. Newborn Hearing Screening — A Silent Revolution. *The New England Journal of Medicine*. 2006;354(20):2151-2164. doi: 10.1056/NEJMra050700.
2. The Joint Committee on Infant Hearing. Year 2019 Position Statement: Principles and Guidelines for Early Hearing Detection and Intervention Programs. *The Journal of Early Hearing Detection and Intervention*. 2019;4(2):1-44.
3. Saeed Heidari, Alireza Olyaei Manesh, Fatemeh Rajabi. The sensitivity and specificity of automated auditory brainstem response and otoacoustic emission in neonatal hearing screening: a systematic review. *Auditory and vestibular research*. 2015;24(3).
4. Hsu H, Lee F, Huang H. Results of a 1-year government-funded newborn hearing screening program in Taiwan. *The Laryngoscope*. 2013;123(5):1275-1278. doi: 10.1002/lary.23713.
5. Gina A, Bednarczyk N, Jayawardena A, Rea P, Arshad Q, Saman Y. Association between in-utero HIV exposure and auditory brainstem response. *Neurology*. 2020. doi: 10.1212/WNL.0000000000010969.

1  
2  
3 6. Meena RS, Meena D, Babu D, Singh BK, Verma PC. Role of Transient Evoked  
4 Otoacoustic Emission Beyond Screening of Hearing Impairment: A Study of 400  
5 Cases. *Indian J Otolaryngol Head Neck Surg.* 2012;65(2):134-139. doi:  
6  
7  
8  
9  
10 10.1007/s12070-012-0597-3.  
11  
12  
13  
14  
15  
16  
17  
18  
19  
20  
21  
22  
23  
24  
25  
26  
27  
28  
29  
30  
31  
32  
33  
34  
35  
36  
37  
38  
39  
40  
41  
42  
43  
44  
45  
46  
47  
48  
49  
50  
51  
52  
53  
54  
55  
56  
57  
58  
59  
60

Confidential: For Review Only

# BMJ Paediatrics Open

## Universal Newborn Hearing Screening in South Africa - a single centre study

|                               |                                                                                                                                                                                                                                                                                                                                                                                                                                                                                                                                                                |
|-------------------------------|----------------------------------------------------------------------------------------------------------------------------------------------------------------------------------------------------------------------------------------------------------------------------------------------------------------------------------------------------------------------------------------------------------------------------------------------------------------------------------------------------------------------------------------------------------------|
| Journal:                      | <i>BMJ Paediatrics Open</i>                                                                                                                                                                                                                                                                                                                                                                                                                                                                                                                                    |
| Manuscript ID                 | bmjpo-2020-000976.R1                                                                                                                                                                                                                                                                                                                                                                                                                                                                                                                                           |
| Article Type:                 | Original research letter                                                                                                                                                                                                                                                                                                                                                                                                                                                                                                                                       |
| Date Submitted by the Author: | 05-Feb-2021                                                                                                                                                                                                                                                                                                                                                                                                                                                                                                                                                    |
| Complete List of Authors:     | Gina, Ayanda; University of KwaZulu-Natal<br>Bednarczuk, Nadja F; University of Leicester, Department of Psychology, Neuroscience and Behaviour<br>Jayawardena, Asitha; Harvard Medical School, E.N.T Department<br>Rea, Peter; Leicester Royal Infirmary, E.N.T Department<br>Arshad, Qadeer; University of Leicester College of Medicine Biological Sciences and Psychology<br>Saman, Yougan; University of Leicester, Department of Psychology, Neuroscience and Behaviour; Leicester Royal Infirmary, Department of Psychology, Neuroscience and Behaviour |
| Keywords:                     | Audiology                                                                                                                                                                                                                                                                                                                                                                                                                                                                                                                                                      |
|                               |                                                                                                                                                                                                                                                                                                                                                                                                                                                                                                                                                                |

SCHOLARONE™  
Manuscripts



I, the Submitting Author has the right to grant and does grant on behalf of all authors of the Work (as defined in the below author licence), an exclusive licence and/or a non-exclusive licence for contributions from authors who are: i) UK Crown employees; ii) where BMJ has agreed a CC-BY licence shall apply, and/or iii) in accordance with the terms applicable for US Federal Government officers or employees acting as part of their official duties; on a worldwide, perpetual, irrevocable, royalty-free basis to BMJ Publishing Group Ltd ("BMJ") its licensees and where the relevant Journal is co-owned by BMJ to the co-owners of the Journal, to publish the Work in this journal and any other BMJ products and to exploit all rights, as set out in our [licence](#).

The Submitting Author accepts and understands that any supply made under these terms is made by BMJ to the Submitting Author unless you are acting as an employee on behalf of your employer or a postgraduate student of an affiliated institution which is paying any applicable article publishing charge ("APC") for Open Access articles. Where the Submitting Author wishes to make the Work available on an Open Access basis (and intends to pay the relevant APC), the terms of reuse of such Open Access shall be governed by a Creative Commons licence – details of these licences and which [Creative Commons](#) licence will apply to this Work are set out in our licence referred to above.

Other than as permitted in any relevant BMJ Author's Self Archiving Policies, I confirm this Work has not been accepted for publication elsewhere, is not being considered for publication elsewhere and does not duplicate material already published. I confirm all authors consent to publication of this Work and authorise the granting of this licence.

## Universal Newborn Hearing Screening in South Africa - a single centre study

Ayanda Gina MSc<sup>1</sup>, Nadja F Bednarczuk MBBS<sup>2,3</sup>, Asitha Jayawardena MD MPH<sup>4</sup>,  
Peter Rea MA BM BCh<sup>5</sup>, Qadeer Arshad PhD<sup>2</sup>, Yougan Saman MD PhD<sup>1, 2, 5\*</sup>

### Author affiliations;

1. School of Clinical Medicine, University of KwaZulu-Natal, Durban, South Africa
2. inAmind Laboratory, Department of Psychology, Neuroscience and Behaviour, University of Leicester, Leicester, UK. LE1 7RH
3. King's College Hospital London, Denmark Hill, SE5 9RS, London UK
4. E.N.T Department, Massachusetts Eye and Ear Infirmary, Harvard Medical School, USA
5. E.N.T Department, Leicester Royal Infirmary, Leicester, UK, LE1 5WW

\*Correspondence should be addressed to;

Dr Yougan Saman  
inAmind Laboratory,  
Department of Neuroscience, Psychology and Behaviour,  
University Road, Leicester,  
Leicester,  
UK  
LE1 7RH

[yougan.saman@uhl-tr.nhs.uk](mailto:yougan.saman@uhl-tr.nhs.uk)

Study funding: EuropeAid/134258/M/ACT/ZA Cfp2/2014/15/87

Word count (600)

Author Contribution's:

AG: Performed experiments, Data analysis, wrote the manuscript

NB: Data analysis, edited the manuscript

AJ: Experimental design, technical expertise, edited the manuscript

PR: technical expertise and edited the manuscript

QA: Data analysis, Technical expertise and wrote the manuscript

YS: Conceptualised study, experimental design, wrote manuscript and supervised study

Confidential: For Review Only

1  
2  
3 **ABSTRACT: Hearing screening for new-born babies is an established protocol**  
4 **in many high-income countries. Implementing such screening has yielded**  
5 **significant socio-economic advantages at both an individual and societal level.**  
6 **This has yet to permeate low and middle-income countries (LMIC). Here we**  
7 **illustrate how new-born hearing screening needs to be contextually adapted for**  
8 **effective utilisation and implementation in a LMIC. Specifically, this advocates**  
9 **the use of auditory brainstem testing as the first-line approach. We propose that**  
10 **such adaptation serves to maximise clinical efficacy and community**  
11 **participation at a reduced cost.**  
12  
13  
14  
15  
16  
17  
18  
19  
20  
21  
22  
23  
24  
25  
26  
27  
28  
29  
30  
31  
32  
33  
34  
35  
36  
37  
38  
39  
40  
41  
42  
43  
44  
45  
46  
47  
48  
49  
50  
51  
52  
53  
54  
55  
56  
57  
58  
59  
60

1  
2  
3  
4  
5 **INTRODUCTION:** Newborn hearing screening facilitated a silent revolution for the  
6 hearing-impaired yielding significant personal, societal and economic benefits <sup>1</sup>.  
7 However, universal screening still faces barriers, namely the need to pragmatically  
8 integrate screening with existing health infrastructure, cost considerations and access  
9 to healthcare <sup>1</sup>, thus presenting unique challenges depending on the geographical  
10 context.  
11  
12  
13  
14  
15

16  
17 Otoacoustic emissions (OAE) and automated auditory brainstem responses (AABR)  
18 have made screening possible, with factors such as cost and training ease being the  
19 main considerations when designing a program <sup>1, 2</sup>. OAE's have historically been  
20 cheap and quick but as many as 40% of babies can fail this test requiring referral to  
21 specialists for either a repeat OAE or an ABR <sup>3</sup>. Technological advances since the  
22 advent of screening have seen both the cost-base and time required to perform AABR  
23 considerably reduced<sup>4</sup> making this an attractive first-line option. Such a proposition is  
24 strengthened when considering the cost of follow-up, poor compliance due to limited  
25 access to healthcare and maternal anxiety being decisive factors.  
26  
27  
28  
29  
30  
31  
32  
33

34 Accordingly, in settings where early discharge is the norm and access to healthcare is  
35 poor, we propose that it may be more effective to screen neonates with AABR as the  
36 first-line tool.  
37  
38  
39  
40

41 **METHODS:** 2269 healthy neonates were recruited from the maternity wards following  
42 written parental consent in Amajuba district, KwaZulu-Natal, South Africa. Babies were  
43 generally tested with hours of birth as healthy babies are discharged at 6 hours post-  
44 delivery. Testing was always performed in a silent room within the hospital. Ethical  
45 approval was obtained from the local research ethics committee (\* University of  
46 KwaZulu-Natal (UKZN) Biomedical-Research Ethics Committee (BREC:  
47 BFC260/16(Sub-study: BFC412/15).  
48  
49  
50  
51  
52  
53  
54

55 To assess the auditory brainstem response (ABR) and oto-acoustic emissions (OAE)  
56 for each neonate we used the Path-Sentiero®-Advanced-Screener (Landsberger,  
57 Germany). For auditory brainstem testing we implemented a chirp stimulus  
58 (broadband 1-8kHz) with alternating polarity and a stimulus rate of 85Hz and sound  
59  
60



1  
2  
3 level of 35 dBHL <sup>5</sup> . For transient OAE, a non-linear broadband click stimulus was  
4 presented at a fixed sound-level of 80 db SPL <sup>6</sup>. All testing was performed by an  
5 audiologist with expertise in paediatric testing (AG), assisted by two research nurses.  
6  
7  
8  
9

10  
11 *Patient and Public Involvement statement: After identification of the community's needs, the*  
12 *researchers engaged in consultation with the department of health district and hospital*  
13 *managers who were in full support of potentially developing a screening programme.*  
14 *Patients were not involved in the design of the study as it was incorporated into the existing*  
15 *maternal and child health care services.*  
16  
17  
18

19  
20 **RESULTS:** We observed that in neonates screened with ABR, 2120 babies passed  
21 the test, and 149 of the cohort failed the screening. Contrastingly, the OAE test passed  
22 only 655 babies in the cohort and failed 1614 babies. Accordingly, OAE testing would  
23 have resulted in most babies needing referral.  
24  
25  
26

27  
28 **DISCUSSION:** Our findings highlight that adopting the OAE first protocol in our sample  
29 would have resulted in 1465 unnecessary referrals, imparting significant financial  
30 burden upon both the individual and the healthcare system as well as considerable  
31 anxiety for already disenfranchised parents. Although, the cost-base of ABR testing is  
32 higher, when factoring in not only the equipment costs but also the costs associated  
33 with consumables and maintenance, this can effectively be mitigated against by the  
34 volume of avoidable referrals. We thus highlight the need for contextually relevant  
35 screening as a prerequisite to effectively engage all stakeholders including the  
36 families, government services and clinicians in order for such programs to be deemed  
37 viable. Ideally children need to be screened prior to discharge as the birth hospital is  
38 the ideal setting to ensure compliance. For a service to be successful in the South  
39 African context where early hospital discharge is the norm, screening programs have  
40 to adjust to ensure uptake.  
41  
42  
43  
44  
45  
46  
47  
48  
49  
50  
51

52 These findings have a wider contextual implication, as healthcare resources across  
53 the board are continually being stretched. Thus, a critical spotlight is currently being  
54 placed on expensive initiatives such as screening programs to adapt to simultaneously  
55 maximise clinical efficacy and community participation at an ever-reducing cost.  
56  
57  
58  
59  
60

1  
2  
3  
4  
5 **Acknowledgements:** Firstly, we would like to sincerely thank all the mothers for  
6 agreeing to participate in this study. Also, we would like to thank the two brilliant  
7 research nurses Zama Khubheka and Thembi Nkosi as well as Precious Buthelezi -  
8 the district rehabilitation coordinator for KZN Department of Health. Finally, we would  
9 like to thank the EU for funding this project and the Red Cross Air mercy service for  
10 assistance with travel.  
11  
12  
13  
14  
15  
16  
17  
18  
19

## 20 REFERENCES

- 21  
22  
23 1. Morton CC, Nance WE. Newborn Hearing Screening — A Silent Revolution. *The*  
24 *New England Journal of Medicine*. 2006;354(20):2151-2164. doi:  
25  
26 10.1056/NEJMra050700.  
27  
28  
29  
30  
31 2. The Joint Committee on Infant Hearing. Year 2019 Position Statement: Principles  
32 and Guidelines for Early Hearing Detection and Intervention Programs. *The Journal*  
33 *of Early Hearing Detection and Intervention*. 2019;4(2):1-44.  
34  
35  
36  
37  
38  
39 3. Saeed Heidari, Alireza Olyaei Manesh, Fatemeh Rajabi. The sensitivity and  
40 specificity of automated auditory brainstem response and otoacoustic emission in  
41 neonatal hearing screening: a systematic review. *Auditory and vestibular research*.  
42 2015;24(3).  
43  
44  
45  
46  
47  
48  
49 4. Hsu H, Lee F, Huang H. Results of a 1-year government-funded newborn hearing  
50 screening program in Taiwan. *The Laryngoscope*. 2013;123(5):1275-1278. doi:  
51  
52 10.1002/lary.23713.  
53  
54  
55  
56  
57  
58  
59  
60

1  
2  
3 5. Gina A, Bednarczuk N, Jayawardena A, Rea P, Arshad Q, Saman Y. Association  
4 between in-utero HIV exposure and auditory brainstem response. *Neurology*. 2020.  
5  
6 doi: 10.1212/WNL.00000000000010969.  
7  
8  
9

10  
11 6. Meena RS, Meena D, Babu D, Singh BK, Verma PC. Role of Transient Evoked  
12 Otoacoustic Emission Beyond Screening of Hearing Impairment: A Study of 400  
13 Cases. *Indian J Otolaryngol Head Neck Surg*. 2012;65(2):134-139. doi:  
14  
15 10.1007/s12070-012-0597-3.  
16  
17  
18  
19  
20  
21  
22  
23  
24  
25  
26  
27  
28  
29  
30  
31  
32  
33  
34  
35  
36  
37  
38  
39  
40  
41  
42  
43  
44  
45  
46  
47  
48  
49  
50  
51  
52  
53  
54  
55  
56  
57  
58  
59  
60
